# Supplementary material for: Combining Cluster Analysis of Air Pollution and Meteorological Data with Receptor Model Results for Ambient PM2.5 and PM10
Source: MDPI journal article supplement (doi:10.3390/ijerph17228455), 2020-11-15
Supplement: s1 [file s1]

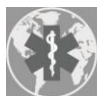

*Supplementary material for*

**Combining cluster analysis of air pollution and meteorological data with receptor model results for ambient PM<sub>2.5</sub> and PM<sub>10</sub>**

**Héctor Jorquera <sup>1,2\*</sup> and Ana María Villalobos <sup>3</sup>**

<sup>1</sup> Departamento de Ingeniería Química y Bioprocesos, Pontificia Universidad Católica de Chile, Santiago, Chile; [jorquera@ing.puc.cl](mailto:jorquera@ing.puc.cl)

<sup>2</sup> Centro de Desarrollo Urbano Sustentable; [jorquera@ing.puc.cl](mailto:jorquera@ing.puc.cl)

<sup>3</sup> DICTUC S.A., Vicuña Mackenna 4860, Santiago, Chile; [anamariav.i@hotmail.com](mailto:anamariav.i@hotmail.com)

\* Correspondence: [jorquera@ing.puc.cl](mailto:jorquera@ing.puc.cl); Tel.: +56-22-354-4421 (H.J.) +56-22-354-4233 (A.V.)

**Table S1.** Emission inventory for Calama<sup>1</sup>, year 2016 [ton/year].

| Sector           | PM <sub>10</sub> | PM <sub>2.5</sub> | SO <sub>2</sub> | NO <sub>x</sub> | CO     | VOC   |
|------------------|------------------|-------------------|-----------------|-----------------|--------|-------|
| Agriculture      | 0.5              | 0.4               | 0.01            | 2.9             | 1.8    | 0.5   |
| Airport          | 1.4              | 1.4               | 17.5            | 253.25          | 188.7  | 0.0   |
| Motor Vehicles   | 23.8             | 22.1              | 1.3             | 502.47          | 1665.6 | 471.3 |
| Off-road engines | 5.9              | 5.7               | 0.2             | 50.25           | 37.6   | 8.6   |
| Construction     | 8.7              | 0.9               | 0.0             | 0.00            | 0.00   | 0.0   |
| Residential      | 7.2              | 6.8               | 1.5             | 42.36           | 113.1  | 33.1  |
| Road dust        | 344.8            | 50.1              | 0               | 0               | 0      | 0     |
| Total            | 392.2            | 87.3              | 20.44           | 851.26          | 2008   | 523.4 |

<sup>1</sup> Adapted from: DICTUC, 2019. Antecedentes técnicos para el PDA de Calama [WWW Document]. URL [http://planesynormas.mma.gob.cl/archivos/2019/proyectos/25052019\\_dictuc26ab19.rar](http://planesynormas.mma.gob.cl/archivos/2019/proyectos/25052019_dictuc26ab19.rar) (accessed 9.29.20).

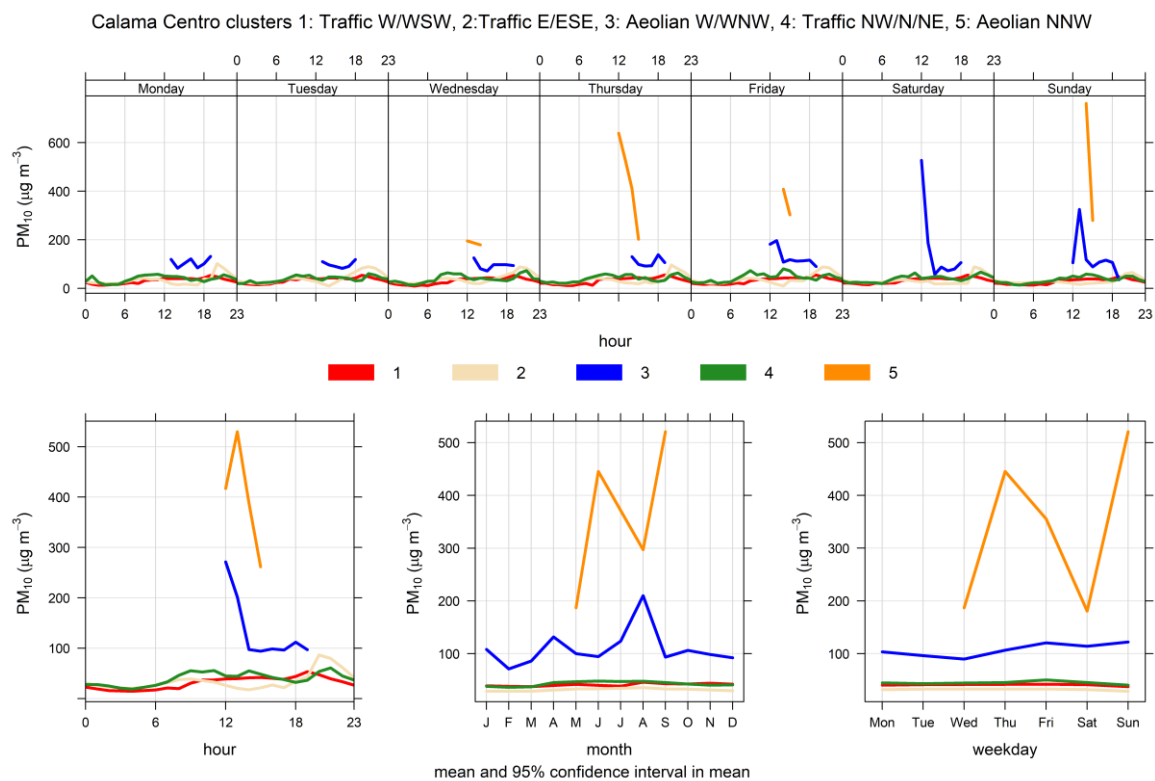

**Figure S1.** PM<sub>10</sub> time variability results for a 5-cluster solution for Calama.

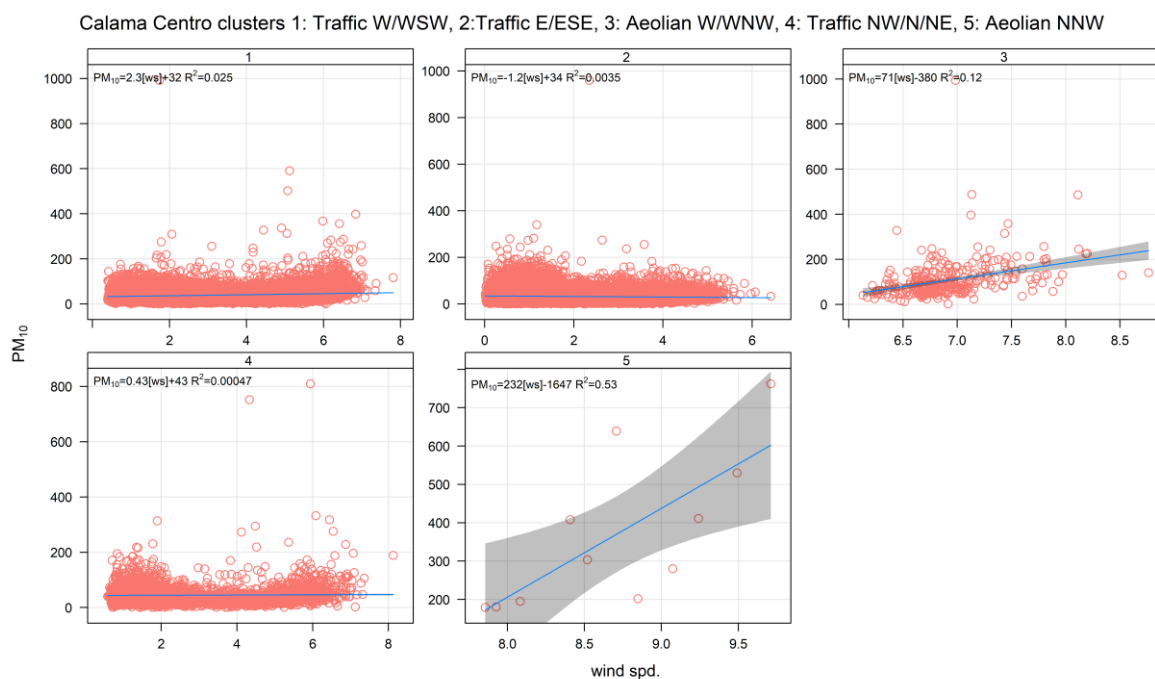

**Figure S2.** PM<sub>10</sub> – wind speed scatter plot by cluster, for a 5-cluster solution for Calama.

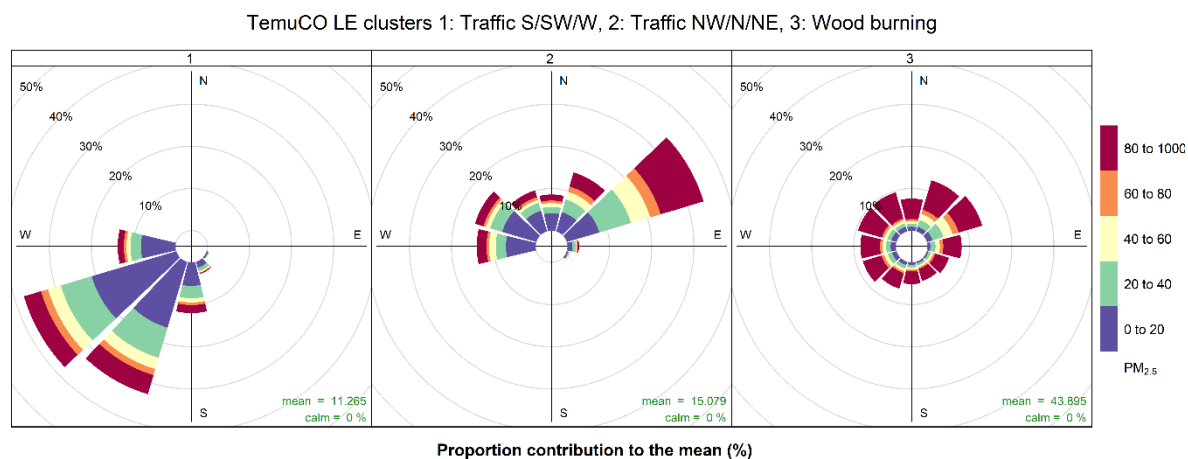

**Figure S3.** Pollution rose results by cluster, for a 3-cluster solution for Temuco.

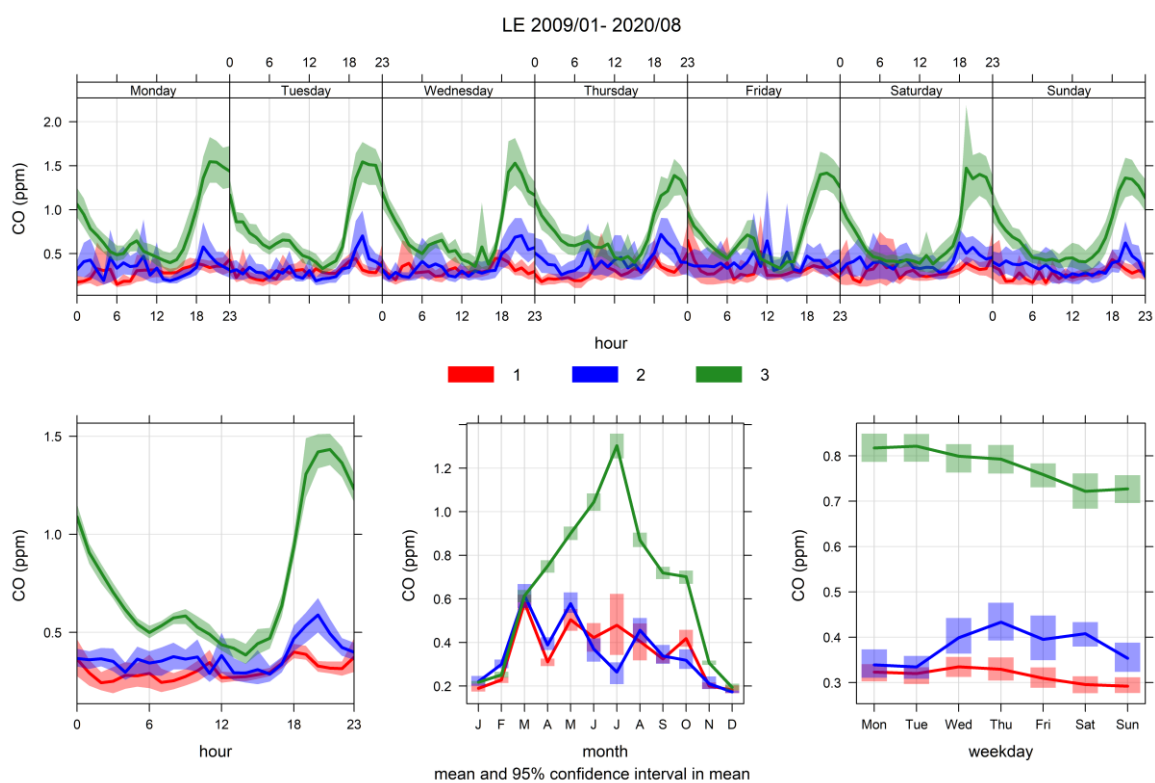

**Figure S4.** Time variability of CO by cluster, for a 3-cluster solution for Temuco.

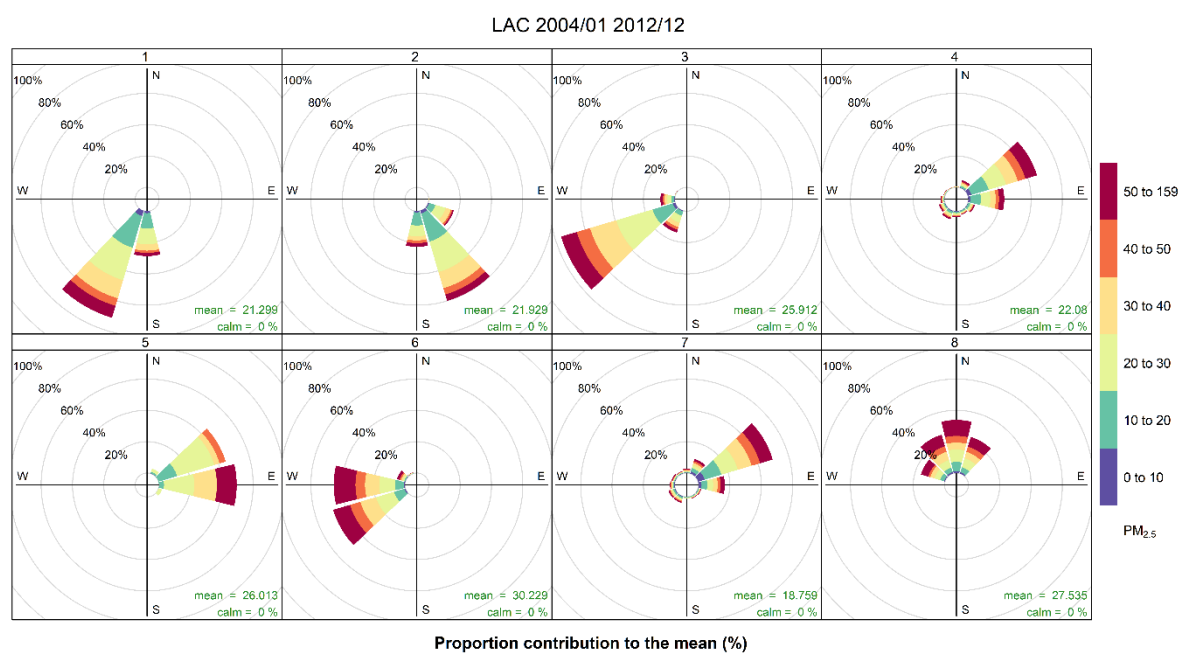

**Figure S5.** Pollution rose by cluster, for an 8-cluster solution for Santiago.

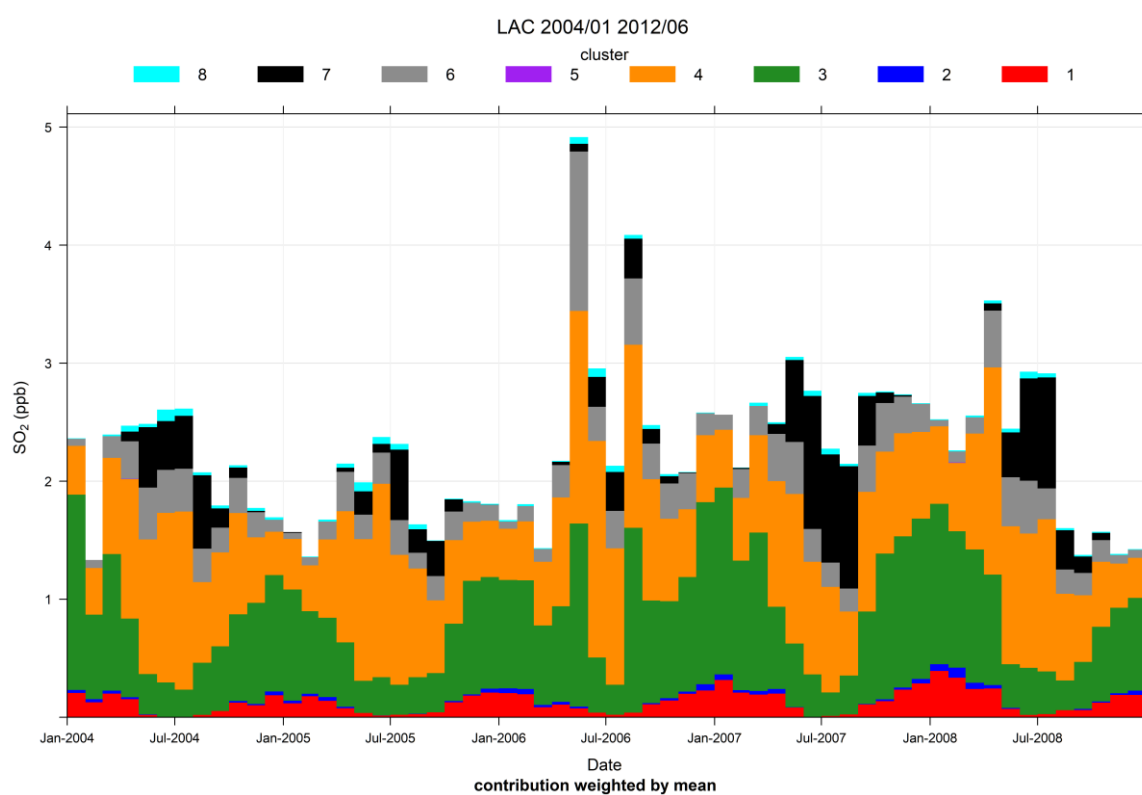

**Figure S6.** Source apportionment for  $\text{SO}_2$ , for an 8-cluster solution for Santiago.
